1

2

## Revisiting Demand Rules for Gene Regulation

3

4

5

6 Mahendra Kumar Prajapat, Kirti Jain, Debika Choudhury, Gauri S. Choudhary, & Supreet Saini\*

7

Department of Chemical Engineering

8

Indian Institute of Technology Bombay, Mumbai - 400076, India

9

10 \*Corresponding Author Email: [ssaini@iitb.ac.in](mailto:ssaini@iitb.ac.in), Phone: 91 22 25767216, Fax: 91 22 2572 6895

11

12

13

14

15 Running Title: Revisiting Demand Rules for Gene Regulation

16 Keywords: Gene Regulation, Demand Rules, Transcription Networks

17 **Abstract**

18

19 Starting with Savageau's pioneering work from 1970s, here, we choose the simplest transcription  
20 network and ask: How does the cell choose a regulatory topology from the different available  
21 possibilities? We study the natural distribution of topologies at genome, systems, and micro-level in  
22 *E. coli* and perform stochastic simulations to help explain the differences in natural distributions.  
23 Analyzing regulation of amino acid biosynthesis and carbon utilization in *E. coli* and *B. subtilis*, we  
24 observe many deviations from the demand rules, and observe an alternate pattern emerging.  
25 Overall, our results indicate that choice of topology is drawn randomly from a pool of all networks  
26 which satisfy the kinetic requirements of the cell, as dictated by physiology. In short, simply, the cell  
27 picks "whatever works".

28

## 29 Introduction

30

31 A critical feature of all living organisms is the ability to tune behavior in response to stimuli [1-5]. The  
32 most widespread and well-understood mode of this tuning is transcription, which enables the cells  
33 to modulate gene expression in response to cues. Looking at the simplest transcription network,  
34 where a regulator R, controls expression of a target T - different possibilities emerge. Control of the  
35 target, might be via positive or negative regulation. When we consider the fact that most  
36 transcription factors in *E. coli* are also auto-regulators, six possible topologies emerge (Figure 1) [3,  
37 4, 6-10]. In this study, we seek to answer the following question: Among all the available regulatory  
38 designs, how does a cell pick one to control target expression?

39

40 In a series of papers in the 1970s, Savageau proposed "demand rules for gene regulation" [11-16],  
41 according to which, a target T is positively regulated (Figure 1A-C) if, in the organism's natural  
42 habitat, T is required for a high fraction of time. On the other hand, if the target is only required  
43 sporadically, it tends to be regulated negatively (Figure 1D-F) [12, 13]. Evidence was provided in the  
44 shape of conformity in regulation of sugar utilization enzymes in *E. coli* with the demand rules [11,  
45 12]. In 2006, Alon et. al. provided a functional explanation for demand rules [17]. They argued that  
46 positive regulation for a frequently needed target T ensured erroneous binding of other  
47 transcription factors to the promoter was minimized. Alon et. al. demonstrate and propose, in a  
48 later report [18], that such an approach for gene regulation acts as an insulator of the promoter  
49 regions, preventing erroneous transcription.

50

51 However, demand rules raise a few interesting questions. Active control, as proposed by the  
52 demand rules, will increase the demand of regulators in the cell. The cost associated with production  
53 of additional regulators for control is likely detrimental for cellular growth [19-21]. In addition,  
54 demand rules seem contrary to the concept of genetic robustness, which focuses on loss of fitness  
55 due to mutations acquired by an individual [22]. How then do we reconcile these seemingly opposite  
56 logics? In a 2009 report, Hwa et. al. have, via a theoretical framework, demonstrated that the choice  
57 of mode of gene regulation could be biased for or against demand rules, and is dictated by  
58 population size and the time scale of environmental evolution [23]. Their framework remains to be  
59 experimentally tested though. An alternate approach can be to examine response of different  
60 topologies to cues. The response can be quantified in terms of parameters like time of response,  
61 response to noise, and cost of control [3, 24-28]. However, questions like whether, over

62 physiologically relevant range of biochemical parameter values, there are inherent qualitative  
63 differences in the response that can be generated by different topologies remain unanswered.

64

65 In this work, we perform simulations of the simplest transcriptional network (**Figure 1**), and compare  
66 our results with the natural distribution of regulatory interactions among topologies in *E. coli*. We  
67 revisit some of the results proposed by Savageau and study in detail the control of sugar utilization  
68 and amino acid biosynthesis in *E. coli*. Finally, we characterize the role of control cost in dictating  
69 fitness of a cell. Put together, our results indicate that, contrary to demand rules, choice of a  
70 particular topology for gene expression control is likely chosen randomly from all available  
71 topologies which satisfy the dynamic demands of physiology associated with a cellular function.

## 72 Results

73

### 74 ***At the global scale, E. coli chooses topologies differentially for control of gene expression***

75 To understand the "logic" behind choice of topology for gene expression control, we enumerated all  
76 regulatory interactions in *E. coli*, and classified them in one of the six topologies in (Figure 1) [29].  
77 We note that there is no qualitative difference in the number of interactions which are controlled via  
78 positive (~49.6%) or negative regulation (~50.4%) (Figure 2A). Including global regulators (and their  
79 regulons) in the enumeration yields similar results (Figure S1(A)). We also repeated the analysis by  
80 defining an interaction as a regulator R controlling a promoter (instead of all genes in an operon)  
81 (Figure S1(B-C)), and the analysis exhibits that there is no significant bias in *E. coli* choosing positive  
82 or negative regulation preferentially.

83

84 However, the R-T frequency distribution changes qualitatively when we analyze the number of  
85 interactions in each of the six topologies in (Figure 1). As represented in (Figure 2B), among the six  
86 topologies, F is over-represented. This is followed by topologies A, B, C, and D, with no statistically  
87 significant difference between them. Last, topology E is the least represented (~5% of all  
88 interactions). We observe the same general trend when we define one interaction as regulator R  
89 controlling a promoter, instead of a gene (Figure S2A). On including the global regulators from the  
90 analysis, a slightly different picture emerges, where topologies C and F are the most represented (as  
91 most global regulators auto-regulate themselves), followed by topologies B, D, A, and E (which is  
92 again under represented) (Figure S2(B-C)).

93

94 Overall, our analysis suggests that *E. coli* prefers certain regulatory arrangements over others. What  
95 are the factors that dictate this choice? Various possibilities exist, including, demand rules [11-16],  
96 error-minimization [17], or minimizing cost of control [19-21]. To understand the differences  
97 between the distribution of the six topologies, we study and analyze their distribution at two  
98 different scales. At the first level, we analyze frequency distribution of regulatory arrangements at a  
99 systems level, where a system is defined as sum of all interactions which serve the cell towards a  
100 common function. At the second level, we analyze in detail the demand and corresponding  
101 regulatory design at a micro level, specifically those related to amino acid biosynthesis and carbon  
102 source utilization.

103

### 104 ***Differential choice of topology at a systems scale***

105 To analyze frequency distribution of topologies in further detail, we separated R and T interactions in  
106 *E. coli* into six functional sub-groups: (a) amino acid transport and metabolism, (b) sugar metabolism  
107 and energy production, (c) coenzyme transport and metabolism, (d) inorganic transport and  
108 metabolism, (e) cell division and nucleotide metabolism, and (f) stress response (Figure 3). In five of  
109 the six classifications, distribution of number of interactions among A-C and D-F is statistically  
110 identical to the distribution observed at the genome scale in *E. coli*. Moreover, when analyzed  
111 individually, we note that in each of the six classifications, topology E is under-represented, and  
112 topology F is over-represented. In addition, the frequency distributions in all six groups is statistically  
113 similar to the one observed in nature (Figure 2B). We revisit the reason and nature of this  
114 distribution later in this manuscript. It is not surprising that topology F is over-represented in nature.  
115 Negative auto-regulation is known to speed up response in cellular systems [9, 25], and both  
116 topologies C and F possess that architecture. However, subtle differences exist. While topology C  
117 speeds up response when the system transitions from an OFF to an ON state, topology F speeds up  
118 cellular response in transition from ON to OFF state. Could other similar dynamic criteria explain the  
119 differential use of topologies in *E. coli*? To help answer this question, stochastic simulations of the  
120 simplest regulatory network between a regulator R and target T were performed (Figure 1).

121

### 122 ***Simulations to quantify performance of networks across topologies***

123 We define a list of factors that best define performance of a regulatory circuit. These include (a)  
124 steady state target expression, (b) time of response, (c) control cost, (d) cell-to-cell variation, (e)  
125 spread of gene expression, and (f) ability to be effectively switched ON and OFF (see methods for  
126 more details). We hypothesize that these six indicators define performance of a genetic network.  
127 Network dynamics are dictated by the values of the associated biochemical parameters. To account  
128 for biases introduced by parameters, we simulated about 100,000 networks (~16,000 networks in  
129 each topology). The choice of parameters for these networks was taken from a uniform spread from  
130 a range. Each network was simulated for 500 cells, and transition from OFF to ON and ON to OFF  
131 tracked.

132

133 Because of our choice of parameters from a parameter space, many networks are "dead" (steady  
134 state target expression less than one); have infinite cost; or have physiologically unviable dynamics.  
135 For analysis, we considered only those networks which express target T and are able to effectively  
136 switch ON/OFF. In addition, we impose limits on the time of activation (& deactivation) and control  
137 cost. Placing these constraints allows us to define a "Performance Box". In rest of the article, we only  
138 consider networks which lie within this "Performance Box". A frequency count of the networks with

139 positive and negative control of T shows that the two are identical (Figure 4A), consistent with the  
140 natural distribution in *E. coli*.

141

142 Frequency distribution of the six topologies shows that, just as in *E. coli*, topology E is under-  
143 represented, and topology F, most represented in the "Performance Box" (Figure 4B). Hence, our  
144 simulations suggest, and we speculate that distribution of a topology in a cell is proportional to the  
145 frequency of the topology in the "Performance Box". We note, however, that there are differences  
146 in the distribution of the networks among the six topologies between our computational results and  
147 the *E. coli* distribution. We hypothesize that these differences in distributions are due to the  
148 inherent differences in the dynamic features of the six topologies.

149

150 *Dynamics of activation and deactivation vary across the six topologies.* Analysis of time of activation  
151 and deactivation indicate that subtle differences exist in the T-t50 space covered by topologies A-C  
152 and D-F (Figure 5A-B). As shown in (Figure 5A), topologies D-F are more suited for slow activation of  
153 targets with small steady state levels. In the OFF state (Figure 5B), we note that physiological  
154 functions with preference for smaller steady state T values and higher deactivation times would  
155 have a greater chance to be represented by topologies A-C. Qualitative differences exist in  
156 performance associated with each of the six topologies (Figure S3). In the ON state, topology C and F  
157 exhibit the widest range of steady state T and activation time. On the other hand, topology E is the  
158 most constrained in terms of the possible values of T. We speculate that this is one of the reasons of  
159 over-representation of topology F, and under-representation of topology E in natural circuits.

160

161 *Cost of control of expression.* (Figure 5C-D) show that while there are large T-cost space regions  
162 which both groups of topologies can exhibit, only topologies A-C can control expression when T is  
163 small. Moreover, this control is exhibited at relatively small control cost. Similarly, when switched  
164 OFF, topologies A-C are better able to switch expression off when the desired T values are small. In  
165 addition, on an average, topologies A-C are able to provide control with a smaller drop in T when  
166 cells are moved from ON to OFF, the physiological significance of which remains unknown.  
167 Comparison of each topology is presented in (Figure S4). During activation, the control cost in  
168 topologies A-E decreases with increase in T. However, in topology F, the decrease is super-linear,  
169 and the resulting fall in cost much more rapid. This difference likely places topology F at an  
170 advantage when high expression of target T is required. Qualitatively, from the pattern of (Figure  
171 S4), we note that topologies A-C behave identically, whereas D and E behave differently. During  
172 deactivation, all topologies (except C) offer a similar pattern of deactivation dynamics and steady

173 state T. We also note, that for topology F, T (in OFF state) is a considerable fraction of T in ON state.  
174 This suggests that topology F is best suited for genes which require small changes in expression  
175 levels in different conditions.

176

177 *Cell to cell variation.* The stochastic nature of gene expression leads to heterogeneity at a single-cell  
178 resolution. Our results show that across the two groups of topologies, there is little qualitative  
179 difference in behavior (Figure 5E-F). Among individual topologies, two key differences exist. First, in  
180 the ON state, topology F is able to exhibit behavior with the widest range of spread in expression of  
181 T. Second, in OFF state, topologies with negative control, all exhibit greater spread in the steady  
182 state T values as compared to topologies A-C. Cell to cell variation is likely key for cells to survive in  
183 uncertain conditions. This is likely another reason for presence of higher than random frequency of F  
184 networks in nature (Figure S5).

185

186 *Switchability.* For optimal physiology, *E. coli* would need to control expression of a large number of  
187 genes. However, the control and tuning of each gene in the OFF or ON state will be unique. Hence,  
188 each physiological role would require a topology most suited to provide appropriate control. From  
189 our analysis (Figure 6), we note that in this respect, topology F offers the widest ratio of steady state  
190 T in ON and OFF conditions, across a large range of T values. Networks in topologies A-C offer a  
191 qualitatively similar and a very limited response dynamics in this regard. In addition, topology E  
192 offers the most limited response in terms of steady state T values, and hence is likely least suited for  
193 most cellular functions.

194

### 195 ***Revisiting Demand Rules for Gene Regulation***

196 To test and apply the demand rules in determining the choice of regulatory topology, we perform  
197 two analyses at a micro scale. In the first, we study amino acid biosynthesis in *E. coli*, primarily  
198 present in mammalian intestine, and with ability to synthesize all 20 amino acids. However, because  
199 of unequal presence in the intestine, not all amino acids are required equally by the bacterium [30,  
200 31]. The demand for amino acids is further biased by the number of codons for each amino acid in  
201 the *E. coli* genome (Sheet S1, Excel). The actual availability of amino acids was therefore calculated  
202 as availability normalized with demand for an amino acid in the *E. coli* genome. In our analysis, we  
203 identified the biosynthesis pathway(s) which are uniquely dedicated to synthesis of a particular  
204 amino acid only [32], analyzed regulation of each gene in the pathway(s), and classified regulation as  
205 positively or negatively regulated topologies.

206



207 Amino acid biosynthesis and transport are cellular functions with inversely related demand. For  
208 instance, if an amino acid is not present in the surroundings (resulting in low demand for  
209 transporters), the biosynthetic demand would be high, and vice versa. In (Figure 7A), the x-axis  
210 represents amino acids in increasing availability in *E. coli* habitat, while the y-axis gives the fraction  
211 of all regulatory interactions, controlling biosynthesis and transport of that amino acid, belonging to  
212 topologies A-C. Our analysis shows that regulation of both biosynthesis and transport exhibit a  
213 statistically insignificant correlation with increasing availability. This is contrary to the demand rules.  
214 Adherence to the demand rules would have meant that transporters of abundant amino acids are  
215 regulated by A-C topologies, and biosynthetic genes for such amino acids are primarily regulated by  
216 D-F topologies. The reverse would have held true for scarcely available amino acids. The same  
217 results hold on including interactions involving global regulators (Figure S6A). (Figure S6B-C) show  
218 the data when amino acid demand is not normalized with the number of codons in the genome –  
219 both the results show statistically insignificant relationship against demand rules. Additionally, we  
220 performed a similar analysis for the soil bacterium *B. subtilis*, and found no correlation between  
221 choice of topology and availability of an amino acid in the surroundings [33, 34] (Figure S7).

222  
223 The demand for proteins encoded by amino acid biosynthesis genes is inversely linked with the  
224 presence of amino acid in the surrounding environment. Hence, we would expect that expression  
225 pattern (and demand) of biosynthetic genes and amino acid transporters is linked inversely.  
226 However, performing a similar analysis on amino acid transporter gene regulation in *E. coli*  
227 demonstrates a lack of correlation between demand for the gene product and choice of topology  
228 (Figure 7A).

229  
230 In the second example, we focus on metabolism of sugars preferred by *E. coli* in its natural habitat  
231 [35]. Based on their abundance, we obtained the relative demand for carbohydrates in the intestine.  
232 For our analysis, we only considered part of metabolism which deals exclusively with a particular  
233 carbon source. The genes encoding the respective enzymes and their regulators were studied, and  
234 classified into activator- or repressor-based topologies. Our results indicate that regulation of  
235 enzymes involved in carbon utilization is independent of the availability of the sugar (Figure 7B). A  
236 similar statistically insignificant result was obtained on including global regulators (Figure S8). In case  
237 of carbon utilization, the expression of transporter genes is positively correlated with expression of  
238 genes involved in catabolism. However, our analysis shows that the choice of topology does not  
239 seem linked with availability of the carbon source (Figures 7B and S8). Similar analysis was

240 performed for carbon utilization in *B. subtilis* and no statistical correlation was observed between  
241 choice of topology and demand for product of gene of interest [33, 34](Figure S9).

242

243 Overall, our results indicate deviations from Savageau's demand rules. A major difference in our and  
244 Savageau's analysis is that we consider all regulatory interactions controlling cellular functions, while  
245 Savageau's work only accounted for the key regulator involved in a particular cellular process, for  
246 example, AraC for arabinose catabolism [11, 13]. Another key difference lies in the fact that our  
247 analysis takes into account auto-regulation of regulatory proteins. This is likely extremely important  
248 in dictating the choice of topology, as seen by differences in topologies D, E, and F in *E. coli*.

249

### 250 ***Cost of control places a growth burden on the cell***

251 Cellular growth is hindered by production of unnecessary proteins [19-21, 36], and as a result,  
252 regulation has a fitness effect [37, 38]. To test this, we performed competition assays between  
253 genetically identical strains with the only difference that one strain was producing GFP. Our analysis  
254 with the *rob* promoter in *E. coli* demonstrates that the cost of additional GFP places a growth burden  
255 on the cell (Figure 8). Similar trends for *ParaBAD* and *PmarRAB* promoters were also observed. This  
256 suggests that the advantage of preventing erroneous transcription by adhering to the demand rules  
257 must offset the disadvantage of additional control cost, for demand rules to prevail.

258

259 As a speculative test of the demand rules, we performed long-term experiments where we fed a  
260 arabinose to *E. coli* for 3000 generations. In parallel, we fed glucose with limited arabinose to the  
261 culture. The culture grown on arabinose had high demand for arabinose utilization genes, whereas  
262 the culture with small amounts of arabinose would only express from *araBAD* operon when out of  
263 glucose - thus creating differential demand for the *araBAD* gene products. AraC is known to be a  
264 dual regulator of the *araBAD* operon, acting as a repressor in absence of arabinose, and activating  
265 expression when bound with arabinose. This dual regulation can be observed experimentally in wild  
266 type *E. coli*. On altering demand for the *araBAD* gene products, the dual regulation can still be  
267 observed in both (with high, and low demand for *araBAD* gene products) the strains (Figure 9A-B). In  
268 a relatively short span of 3000 generations, no switch in mode of regulation was observed, though  
269 the absolute levels of expression were different in the two strains, and had evolved from the parent  
270 wild-type *E. coli*.

## 271 Discussion

272

273 Transcription networks are of interest from a number of perspectives like structure, topology,  
274 dynamics, and evolution [3, 24, 39-42]. Despite significant effort in trying to understand dynamic  
275 features of topologies – an open question remains. Why does a cell choose a particular topology  
276 over the others?

277

278 Demand rules provide an insight into this question. However, our analysis reveals that the  
279 agreement with demand rules is rather limited. What then could be the additional determinants?  
280 Dynamically, as our analysis shows, there are several subtle differences across topologies, and it  
281 could be these differences which dictate choice. Our simulations and comparisons with *E. coli*  
282 distribution suggests that a network is perhaps randomly picked out from a group that satisfies the  
283 demands of physiology. Or simply, the cell picks "whatever works".

284

285 In a 2009 study, Hwa et. al. demonstrated that different modes of regulation lead to qualitatively  
286 different patterns of protein levels when cells are grown in conditions supporting different growth  
287 rates [43]. They demonstrate that constitutively and positively controlled genes exhibit a decrease in  
288 steady state with growth rate, negatively regulated genes can exhibit a weakly negative or a strongly  
289 positive correlation between protein levels and growth rate. Could additional considerations like  
290 maintenance of protein levels at a constant levels, independent of growth rate, be a selective force  
291 for certain physiological roles?

292

293 In terms of what we can explore, our simulations very rapidly approach saturation in as we begin to  
294 increase the complexity of networks. In addition, combinatorial inputs of multiple regulators into  
295 one promoter remain unanswered and unexplored. These additional interactions would make the  
296 possible range of dynamic behaviour much more complex and richer, but at the same time  
297 computationally intractable.

298

## 299 **Experimental Procedure and Mathematical Analysis**

300

### 301 ***Regulatory interactions in E. coli***

302 The R-T interaction dataset for the transcription regulatory networks was acquired from RegulonDB  
303 [29]. There are 197 transcription factors reported in RegulonDB, of which, seven are listed twice,  
304 individually, as well as in dimeric form with another protein. We have considered 190 unique  
305 regulators for our study and their interactions with targets have been classified in two ways; (i)  
306 between regulator protein and target gene and (ii) between regulator protein and promoter (all  
307 genes in an operon). This resulted in 4970 interactions in Regulator-Target gene classification ([Sheet](#)  
308 [S2 in Excel](#)) and 2139 interactions in Regulator-Promoter classification ([Sheet S3 in Excel](#)). Out of 190  
309 transcription factors, seven are global regulators (CRP, H-NS, Lrp, IHF, ArcA, Fis, and FNR) and control  
310 around 51% of all genes in *E. coli* [44]. Excluding interactions of global regulators, there are 2625  
311 interactions in regulator-target gene class and 1176 interactions in regulator-promoter class.  
312 Multiple transcription factors feeding into a promoter were categorized into more than one  
313 topology, depending on the nature of interaction of the target gene with each interacting  
314 transcription factor.

315

### 316 ***Distribution of R-T interactions among six topologies***

317 On the basis of the specific roles in cellular physiology, the interactions were further classified into  
318 six functional sub-groups, as reported in EcoCyc [32]. For each functional sub-group, all the involved  
319 target genes were identified and distributed among six topologies. Biosynthesis pathways for amino  
320 acids and degradation pathways for carbohydrate were studied further in detail.

321

322 *Biosynthesis pathways of amino acids:* For biosynthesis of an amino acid, we considered regulation  
323 of only target genes which play a role in biosynthesis ([Sheet 4 in Excel](#)) of that particular amino acid  
324 and its transport ([Sheet 5 in Excel](#)) only.

325

326 *Frequency of occurrence of amino acids:* Occurrence of each of the 20 amino acids from coding  
327 region of *E. coli* DH10 $\beta$  genome was calculated to calculate the relative demand of all amino acids in  
328 *E. coli* ([Sheet 1 in Excel](#)).

329

330 *Sugar utilization:* Genes encoding for enzymes involved in metabolism of a particular carbon source  
331 until the metabolic branch merges with another in the network were considered in our analysis  
332 ([Sheet 6 in Excel](#)). The interactions between the identified genes and their regulators (R-T) have

333 been distributed across the defined topologies. In addition, genes involved in transport of sugars  
334 were also analysed in same way ([Sheet 7 in Excel](#)).

335

### 336 ***Mathematical analysis of the six topologies***

337 Mathematical model for each topology was formulated by writing ordinary differential equations,  
338 and simulating stochastically. The two differential equations for each topology describe the rate of  
339 change in regulator, R and target, T, as described in Supplement text.

340

341 *Definition of parameter space.* To analyze the six topologies, networks were generated with different  
342 biochemical parameters. To choose parameter values and range, physiologically observed values of  
343 all parameters was analyzed and the resultant space called parameter space ([Figure S10A](#)). From  
344 parameter space, the red region represents commonly observed values reported in literature [41,  
345 45-50], biased towards exhibiting limited diversity in dynamics. In this work, we chose the "unbiased  
346 region" (blue) from parameter space to explore all possible dynamics [41, 45-50].

347

348 *Generation of networks from a topology.* The model of topologies B, C, E, and F consists of seven  
349 parameters whereas of each from A and D consists of five parameters. We generated 16807 ( $7^5$ )  
350 networks for topology A & D and 16384 ( $4^7$ ) networks for topologies B, C, E, and F. Such an approach  
351 was recently adopted by Ma and co-workers in the context of analysis of adaptation in biochemical  
352 networks [51]. We also performed simulations with several other parameter distributions across the  
353 range of values. However, different parameter ranges do not qualitatively affect our analysis.

354

355 *Calculation of performance indicators.* Each network was simulated using Gillespie algorithm to  
356 account for stochasticity [52, 53]. Dynamic simulation of each network in both transitions from OFF  
357 to ON and from ON to OFF state was performed in 500 cells. The detailed flowchart of simulation is  
358 described in ([Figure S10B](#)). The dynamics of each network was recorded and performance indicators  
359 for each network were calculated as described in the Supplement.

360

361 *Definition of "Performance Box".* A box in the performance indicator space defining networks with  
362 robust response, low cost, and fast dynamics was named as "performance box". Networks with  
363 steady state expression of  $T \geq 6$  (A.U.) in ON state, with a minimum switchability factor of 1.3;  
364 activation time ( $t_{50}$ )  $\leq 1$  (A.U.) and deactivation time  $\leq 1.2$  (A.U.); and cost of activation and cost of  
365 deactivation  $\leq 0.5$  (A.U.) were considered to define the outer edges of the "Performance Box".  
366 Networks outside of the performance box were assumed to be more costly, exhibiting minimal

367 expression of target protein T, or/and slow responding networks, and hence excluded from our  
368 analysis. The precise definition of the edges of the performance box presented here represents a  
369 general trend.

370

### 371 **Cost experiment using Flow Cytometry**

372 *E. coli* containing a *rob* promoter fusion with *gfp* integrated at the  $\lambda$  site (plasmid pLA2) on the  
373 chromosome [54, 55] was grown overnight in LB media with kanamycin 25 $\mu$ g/ml in at 37°C with  
374 shaking. *E. coli* with pLA2-*gfp* (without the *rob* promoter) was used as a control. Both cultures were  
375 grown overnight, and then sub-cultured in 1:500 dilution each in LB media with kanamycin 25 $\mu$ g/ml  
376 in the same tube and grown at 37°C with shaking. Samples were collected at various times and then  
377 stored in PBS (containing 34 $\mu$ g/ml chloramphenicol). All the samples were kept on ice in dark  
378 condition. The samples were then analyzed with BD FACS Aria SORP to get relative frequency. The  
379 choice of *rob* promoter was based on its constitutive expression [56]. Competition experiments were  
380 done with the *ParaBAD* promoter and the *PmarRAB* promoter, and similar results observed when  
381 the inducers for the two systems (arabinose and salicylic acid, respectively) were added to the media  
382 [57, 58].

383

### 384 **Evolutionary experiments**

385 *E. coli* grown overnight in LB at 37°C with shaking was sub-cultured (1:100) in tubes containing 1ml  
386 M9 media, 1% casamino acids and a sugar source. The tubes either contained 0.4% arabinose or  
387 0.35% glucose with 0.05% arabinose. The cultures were grown for 24 hours at 37°C, and propagated  
388 daily by sub-culturing 1:100 into fresh M9 media containing respective sugars. The last strains from  
389 each lineage was transformed with plasmid based promoter fusions of arabinose metabolic genes  
390 (*araB* (PEC3876-98156236)), from Thermo Scientific *E. coli* promoter collection (PEC3877).  
391 Fluorescence (488/525nm) and absorbance (600nm) values were measured in a Tecan microplate  
392 reader (Infinite M200 PRO).

393 **Acknowledgements**

394

395 The work was funded by the Innovative Young Biotechnologist Award (IYBA), Department of  
396 Biotechnology, Government of India.

397

## 398 References

399

- 400 1. Neidhardt FC (1996) *Escherichia Coli and Salmonella Typhimurium: Cellular and Molecular*  
401 *Biology*. American Society for Microbiology.
- 402 2. Ptashne M & Gann A (2002) *Genes and Signals*. Cold Spring Harbor Laboratory Press.
- 403 3. Shen-Orr SS, Milo R, Mangan S & Alon U (2002) Network motifs in the transcriptional  
404 regulation network of Escherichia coli. *Nat Genet* **31**, 64-68. Epub 2002 Apr 2022.
- 405 4. Thieffry D, Huerta AM, Perez-Rueda E & Collado-Vides J (1998) From specific gene regulation  
406 to genomic networks: a global analysis of transcriptional regulation in Escherichia coli. *Bioessays* **20**,  
407 433-440.
- 408 5. van Elsas JD, Semenov AV, Costa R & Trevors JT (2011) Survival of Escherichia coli in the  
409 environment: fundamental and public health aspects. *Isme J* **5**, 173-183. doi:  
410 110.1038/ismej.2010.1080. Epub 2010 Jun 1024.
- 411 6. Crews ST & Pearson JC (2009) Transcriptional autoregulation in development. *Curr Biol* **19**,  
412 R241-246. doi: 210.1016/j.cub.2009.1001.1015.
- 413 7. Madan Babu M & Teichmann SA (2003) Evolution of transcription factors and the gene  
414 regulatory network in Escherichia coli. *Nucleic Acids Res* **31**, 1234-1244.
- 415 8. Ngondo RP & Carbon P (2014) Transcription factor abundance controlled by an auto-  
416 regulatory mechanism involving a transcription start site switch. *Nucleic Acids Res* **42**, 2171-2184.  
417 doi: 2110.1093/nar/gkt1136. Epub 2013 Nov 2114.
- 418 9. Rosenfeld N, Elowitz MB & Alon U (2002) Negative autoregulation speeds the response  
419 times of transcription networks. *J Mol Biol* **323**, 785-793.
- 420 10. Savageau MA (1974) Comparison of classical and autogenous systems of regulation in  
421 inducible operons. *Nature* **252**, 546-549.
- 422 11. Savageau MA (1974) Genetic regulatory mechanisms and the ecological niche of Escherichia  
423 coli. *Proc Natl Acad Sci U S A* **71**, 2453-2455.
- 424 12. Savageau MA (1977) Design of molecular control mechanisms and the demand for gene  
425 expression. *Proc Natl Acad Sci U S A* **74**, 5647-5651.
- 426 13. Savageau MA (1983) Regulation of differentiated cell-specific functions. *Proc Natl Acad Sci U*  
427 *S A* **80**, 1411-1415.
- 428 14. Savageau MA (1998) Demand theory of gene regulation. I. Quantitative development of the  
429 theory. *Genetics* **149**, 1665-1676.
- 430 15. Savageau MA (1998) Demand theory of gene regulation. II. Quantitative application to the  
431 lactose and maltose operons of Escherichia coli. *Genetics* **149**, 1677-1691.
- 432 16. Sybesma C (1989) Theoretical biology. In *Biophysics*, pp. 281-290. Springer Netherlands.
- 433 17. Shinar G, Dekel E, Tlusty T & Alon U (2006) Rules for biological regulation based on error  
434 minimization. *Proc Natl Acad Sci U S A* **103**, 3999-4004. Epub 2006 Mar 3996.
- 435 18. Sasson V, Shachrai I, Bren A, Dekel E & Alon U (2012) Mode of regulation and the insulation  
436 of bacterial gene expression. *Mol Cell* **46**, 399-407. doi: 310.1016/j.molcel.2012.1004.1032.
- 437 19. Koch AL (1983) The protein burden of lac operon products. *J Mol Evol* **19**, 455-462.
- 438 20. Kurland CG & Dong H (1996) Bacterial growth inhibition by overproduction of protein. *Mol*  
439 *Microbiol* **21**, 1-4.
- 440 21. Shachrai I, Zaslaver A, Alon U & Dekel E (2010) Cost of unneeded proteins in E. coli is  
441 reduced after several generations in exponential growth. *Mol Cell* **38**, 758-767. doi:  
442 710.1016/j.molcel.2010.1004.1015. Epub 2010 Apr 1029.
- 443 22. de Visser JA, Hermisson J, Wagner GP, Ancel Meyers L, Bagheri-Chaichian H, Blanchard JL,  
444 Chao L, Cheverud JM, Elena SF, Fontana W, et al. (2003) Perspective: Evolution and detection of  
445 genetic robustness. *Evolution* **57**, 1959-1972.



- 446 23. Gerland U & Hwa T (2009) Evolutionary selection between alternative modes of gene  
447 regulation. *Proc Natl Acad Sci U S A* **106**, 8841-8846. doi: 8810.1073/pnas.0808500106. Epub  
448 0808502009 May 0808500122.
- 449 24. Alon U (2007) Network motifs: theory and experimental approaches. *Nat Rev Genet* **8**, 450-  
450 461.
- 451 25. Madar D, Dekel E, Bren A & Alon U (2011) Negative auto-regulation increases the input  
452 dynamic-range of the arabinose system of Escherichia coli. *BMC Syst Biol* **5**:111., 10.1186/1752-  
453 0509-1185-1111.
- 454 26. Mangan S, Itzkovitz S, Zaslaver A & Alon U (2006) The incoherent feed-forward loop  
455 accelerates the response-time of the gal system of Escherichia coli. *J Mol Biol* **356**, 1073-1081. Epub  
456 2005 Dec 1019.
- 457 27. Mangan S, Zaslaver A & Alon U (2003) The coherent feedforward loop serves as a sign-  
458 sensitive delay element in transcription networks. *J Mol Biol* **334**, 197-204.
- 459 28. Wu K & Rao CV (2010) The role of configuration and coupling in autoregulatory gene circuits.  
460 *Mol Microbiol* **75**, 513-527. doi: 510.1111/j.1365-2958.2009.07011.x. Epub 02009 Dec 07016.
- 461 29. Salgado H, Peralta-Gil M, Gama-Castro S, Santos-Zavaleta A, Muniz-Rascado L, Garcia-Sotelo  
462 JS, Weiss V, Solano-Lira H, Martinez-Flores I, Medina-Rivera A, et al. (2013) RegulonDB v8.0: omics  
463 data sets, evolutionary conservation, regulatory phrases, cross-validated gold standards and more.  
464 *Nucleic Acids Res* **41**, D203-213. doi: 210.1093/nar/gks1201. Epub 2012 Nov 1029.
- 465 30. Nixon SE & Mawer GE (1970) The digestion and absorption of protein in man. 2. The form in  
466 which digested protein is absorbed. *Br J Nutr* **24**, 241-258.
- 467 31. Nixon SE & Mawer GE (1970) The digestion and absorption of protein in man. 1. The site of  
468 absorption. *Br J Nutr* **24**, 227-240.
- 469 32. Keseler IM, Mackie A, Peralta-Gil M, Santos-Zavaleta A, Gama-Castro S, Bonavides-Martinez  
470 C, Fulcher C, Huerta AM, Kothari A, Krummenacker M, et al. (2013) EcoCyc: fusing model organism  
471 databases with systems biology. *Nucleic Acids Res* **41**, D605-612. doi: 610.1093/nar/gks1027. Epub  
472 2012 Nov 1099.
- 473 33. Fischer H, Meyer A, Fischer K & Kuzyakov Y (2007) Carbohydrate and amino acid  
474 composition of dissolved organic matter leached from soil. *Soil Biology and Biochemistry* **39**, 2926-  
475 2935, doi: <http://dx.doi.org/10.1016/j.soilbio.2007.06.014>.
- 476 34. Caspi R, Altman T, Billington R, Dreher K, Foerster H, Fulcher CA, Holland TA, Keseler IM,  
477 Kothari A, Kubo A, et al. (2014) The MetaCyc database of metabolic pathways and enzymes and the  
478 BioCyc collection of Pathway/Genome Databases. *Nucleic Acids Res* **42**, D459-471. doi:  
479 410.1093/nar/gkt1103. Epub 2013 Nov 1012.
- 480 35. Chang DE, Smalley DJ, Tucker DL, Leatham MP, Norris WE, Stevenson SJ, Anderson AB,  
481 Grissom JE, Laux DC, Cohen PS, et al. (2004) Carbon nutrition of Escherichia coli in the mouse  
482 intestine. *Proc Natl Acad Sci U S A* **101**, 7427-7432. Epub 2004 May 7423.
- 483 36. Dong H, Nilsson L & Kurland CG (1995) Gratuitous overexpression of genes in Escherichia coli  
484 leads to growth inhibition and ribosome destruction. *J Bacteriol* **177**, 1497-1504.
- 485 37. Dekel E & Alon U (2005) Optimality and evolutionary tuning of the expression level of a  
486 protein. *Nature* **436**, 588-592.
- 487 38. Stoebel DM, Dean AM & Dykhuizen DE (2008) The cost of expression of Escherichia coli lac  
488 operon proteins is in the process, not in the products. *Genetics* **178**, 1653-1660. doi:  
489 1610.1534/genetics.1107.085399. Epub 082008 Feb 085393.
- 490 39. Hartwell LH, Hopfield JJ, Leibler S & Murray AW (1999) From molecular to modular cell  
491 biology. *Nature* **402**, C47-52.
- 492 40. Milo R, Shen-Orr S, Itzkovitz S, Kashtan N, Chklovskii D & Alon U (2002) Network Motifs:  
493 Simple Building Blocks of Complex Networks. *Science* **298**, 824-827, doi:  
494 10.1126/science.298.5594.824.
- 495 41. Sneppen K, Krishna S & Semsey S (2010) Simplified models of biological networks. *Annu Rev*  
496 *Biophys* **39**:43-59., 10.1146/annurev.biophys.093008.131241.

- 497 42. Babu MM, Luscombe NM, Aravind L, Gerstein M & Teichmann SA (2004) Structure and  
498 evolution of transcriptional regulatory networks. *Curr Opin Struct Biol* **14**, 283-291.
- 499 43. Klumpp S, Zhang Z & Hwa T (2009) Growth rate-dependent global effects on gene expression  
500 in bacteria. *Cell* **139**, 1366-1375. doi: 1310.1016/j.cell.2009.1312.1001.
- 501 44. Martinez-Antonio A & Collado-Vides J (2003) Identifying global regulators in transcriptional  
502 regulatory networks in bacteria. *Curr Opin Microbiol* **6**, 482-489.
- 503 45. Mitrophanov AY & Groisman EA (2008) Positive feedback in cellular control systems.  
504 *Bioessays* **30**, 542-555. doi: 510.1002/bies.20769.
- 505 46. Ozbudak EM, Thattai M, Kurtser I, Grossman AD & van Oudenaarden A (2002) Regulation of  
506 noise in the expression of a single gene. *Nat Genet* **31**, 69-73. Epub 2002 Apr 22.
- 507 47. Rosenfeld N, Young JW, Alon U, Swain PS & Elowitz MB (2005) Gene regulation at the single-  
508 cell level. *Science* **307**, 1962-1965.
- 509 48. Rosenfeld N, Young JW, Alon U, Swain PS & Elowitz MB (2007) Accurate prediction of gene  
510 feedback circuit behavior from component properties. *Mol Syst Biol* **3**, 143. Epub 2007 Nov 20.
- 511 49. Santillan M & Mackey MC (2001) Dynamic behavior in mathematical models of the  
512 tryptophan operon. *Chaos* **11**, 261-268.
- 513 50. Suel GM, Garcia-Ojalvo J, Liberman LM & Elowitz MB (2006) An excitable gene regulatory  
514 circuit induces transient cellular differentiation. *Nature* **440**, 545-550.
- 515 51. Ma W, Trusina A, El-Samad H, Lim WA & Tang C (2009) Defining network topologies that can  
516 achieve biochemical adaptation. *Cell* **138**, 760-773. doi: 710.1016/j.cell.2009.1006.1013.
- 517 52. Gillespie DT (1976) A general method for numerically simulating the stochastic time  
518 evolution of coupled chemical reactions. *Journal of Computational Physics* **22**, 403-434, doi:  
519 [http://dx.doi.org/10.1016/0021-9991\(76\)90041-3](http://dx.doi.org/10.1016/0021-9991(76)90041-3).
- 520 53. Gillespie DT (1977) Exact stochastic simulation of coupled chemical reactions. *The Journal of*  
521 *Physical Chemistry* **81**, 2340-2361, doi: 10.1021/j100540a008.
- 522 54. Haldimann A & Wanner BL (2001) Conditional-replication, integration, excision, and retrieval  
523 plasmid-host systems for gene structure-function studies of bacteria. *J Bacteriol* **183**, 6384-6393.
- 524 55. Miller WG, Leveau JH & Lindow SE (2000) Improved gfp and inaZ broad-host-range  
525 promoter-probe vectors. *Mol Plant Microbe Interact* **13**, 1243-1250.
- 526 56. Skarstad K, Thony B, Hwang DS & Kornberg A (1993) A novel binding protein of the origin of  
527 the Escherichia coli chromosome. *J Biol Chem* **268**, 5365-5370.
- 528 57. Cohen SP, Levy SB, Foulds J & Rosner JL (1993) Salicylate induction of antibiotic resistance in  
529 Escherichia coli: activation of the mar operon and a mar-independent pathway. *J Bacteriol* **175**,  
530 7856-7862.
- 531 58. Lee N, Francklyn C & Hamilton EP (1987) Arabinose-induced binding of AraC protein to araI2  
532 activates the araBAD operon promoter. *Proc Natl Acad Sci U S A* **84**, 8814-8818.

533

534

535

## 536 **Figure Legends**

537

538 **Figure 1 Topologies between a regulator R (pink) and a target, T (blue).** In topologies A, B, and C, in  
539 presence of the appropriate environmental or cellular signal, target T is controlled positively by the  
540 regulator. In contrast, target in topologies D, E, and F is repressed by regulator, and the repression is  
541 relieved under appropriate conditions.

542

543 **Figure 2 Frequency distribution of R - T topologies in *E. coli*.** (A) All regulator-target interactions  
544 frequency in *E. coli* among activator- (topologies A, B, C) and repressor-based (topologies D, E, F)  
545 interactions. (B) Distributions of all R-T interactions among the six distinct topologies in *E. coli*.

546

547 **Figure 3 Division of R-T interactions among six functional groups.** For each group, frequency of  
548 activator-based topologies roughly equals repressor-based topologies. Among individual topologies,  
549 F is over-represented and E under-represented in all six functional groups.

550

551 **Figure 4 Frequency distribution of R - T topologies from simulations.** (A) Percent networks  
552 belonging to the activator- and repressor-based topologies in the "Performance Box" and (B) Percent  
553 networks belonging to each of six topologies in the "Performance Box".

554

555 **Figure 5 Dynamic performance of activator- and repressor-based topologies.** (A-B) Steady state T  
556 levels and time of activation/deactivation for all six topologies. A dot on the plot represents each  
557 network. (C-D) Steady state T and cost of control phase plane for the six topologies. (E-F) Steady  
558 state T and spread among the 500 cells at steady state in the topologies. Activator-based topologies  
559 are represented in blue, and repressor-based topologies in red. Shaded regions indicate the region  
560 covered by the activator- and repressor-based topologies. The left panel represents networks in ON  
561 state. Right panel represents OFF state.

562

563 **Figure 6 "Switchability" of networks.** Steady state T in the ON (x-axis) vs. the OFF condition (y-axis)  
564 for all six topologies.

565

566 **Figure 7 Correlation between demand and activator-based control.** (A) X-axis represents amino  
567 acids in normalized increasing availability, and y-axis represents fraction of regulatory interaction in  
568 the activator-based topologies for each amino acid biosynthesis regulon (blue) and its transport  
569 (red). (B) X-axis represents carbon sources in increasing order of preference to *E. coli* in the intestine,

570 and y-axis, the fraction of regulatory interactions controlling expression of metabolic genes involved  
571 in utilization (blue) of each sugar and its transport (red) and belonging to activator-based topologies.

572

573 **Figure 8** Competition between *E. coli* strains exhibits a fitness effect of production of an additional  
574 protein as compared to the control.

575

576 **Figure 9** Long term experiment to track changes, if any, in mode of regulation.  $P_{araBAD}$  expression in  
577 **(A)** strain grown in 0.4% arabinose for 3000 generations. **(B)** strain grown in 0.35% glucose and  
578 0.05% arabinose for 3000 generations. WT strain refers to the evolved strain after 3000 generations  
579 in a particular condition.  $\Delta araC$  strain refers to the mutant created by knocking out *araC* from the  
580 parent evolved strain.

581

582

583 **Figure 1**

584

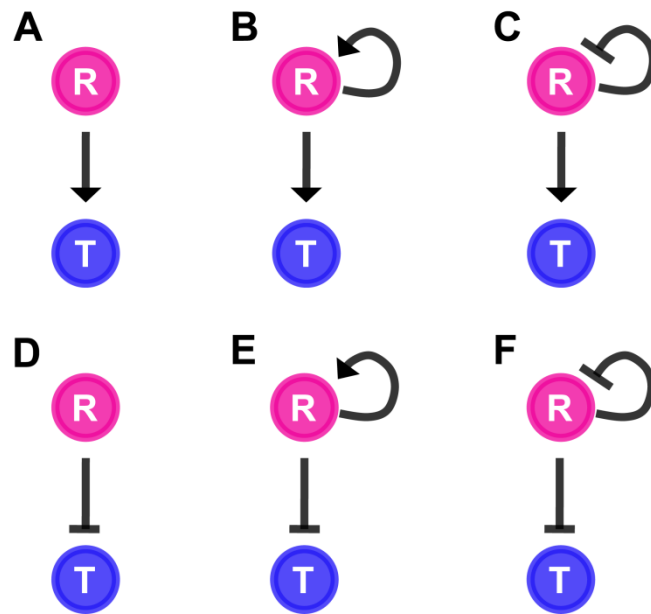

585

586

587 **Figure 2**

588

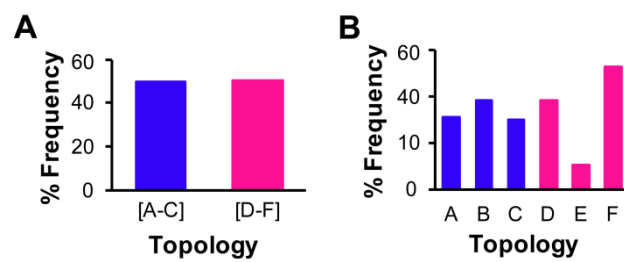

589

590

591 **Figure 3**

592

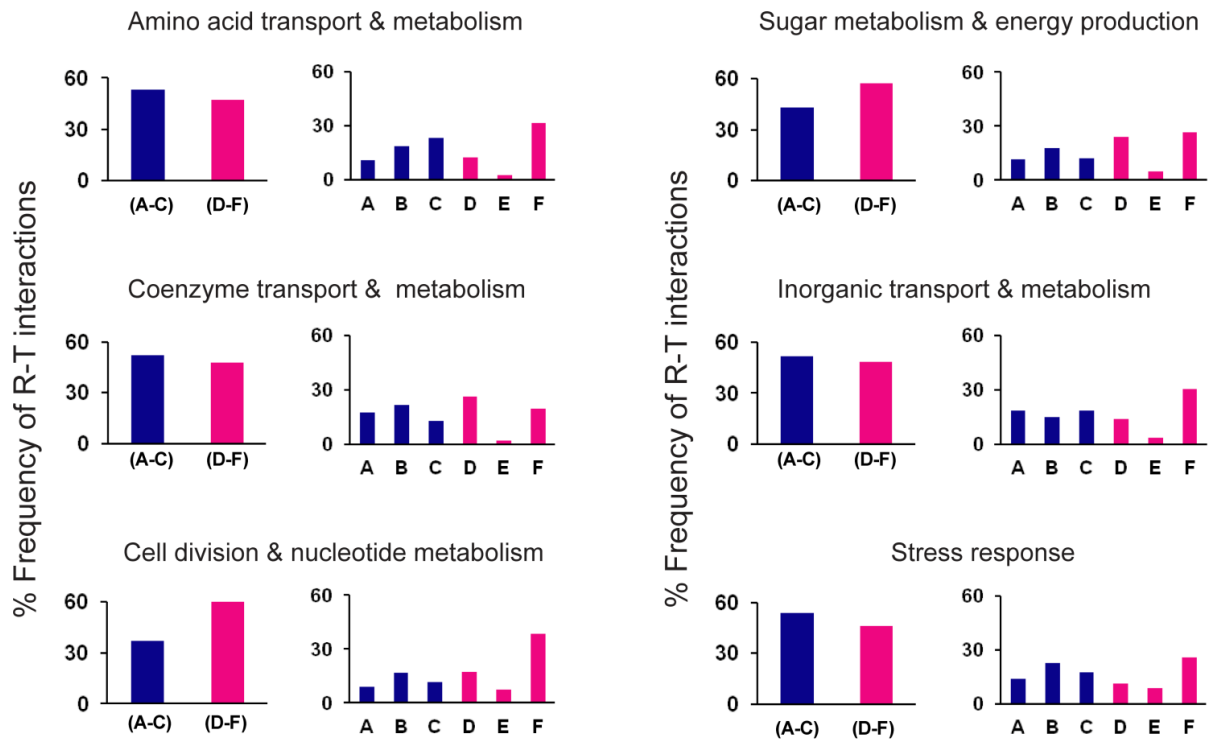

593

594

595 **Figure 4**

596

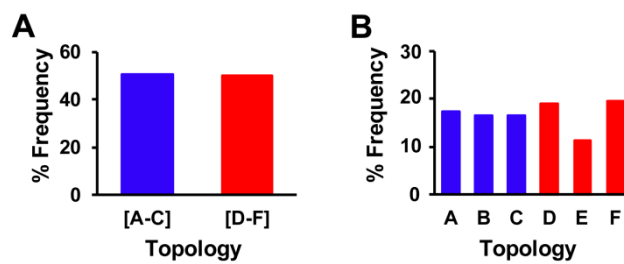

597

598



599 **Figure 5**

600

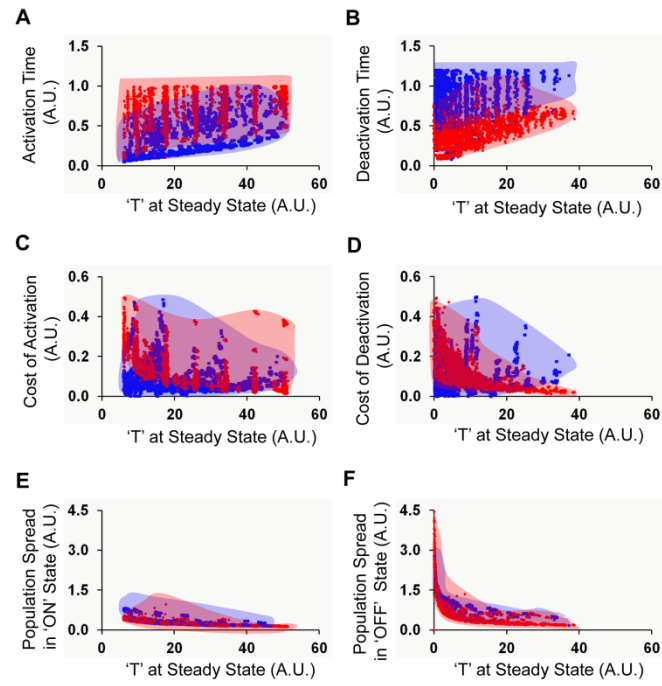

601

602

603 **Figure 6**

604

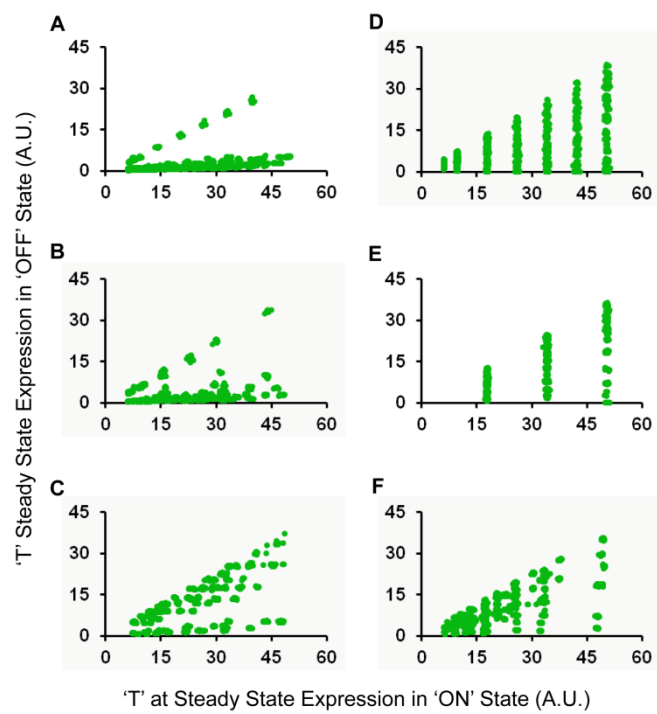

605

606

607 **Figure 7**

608

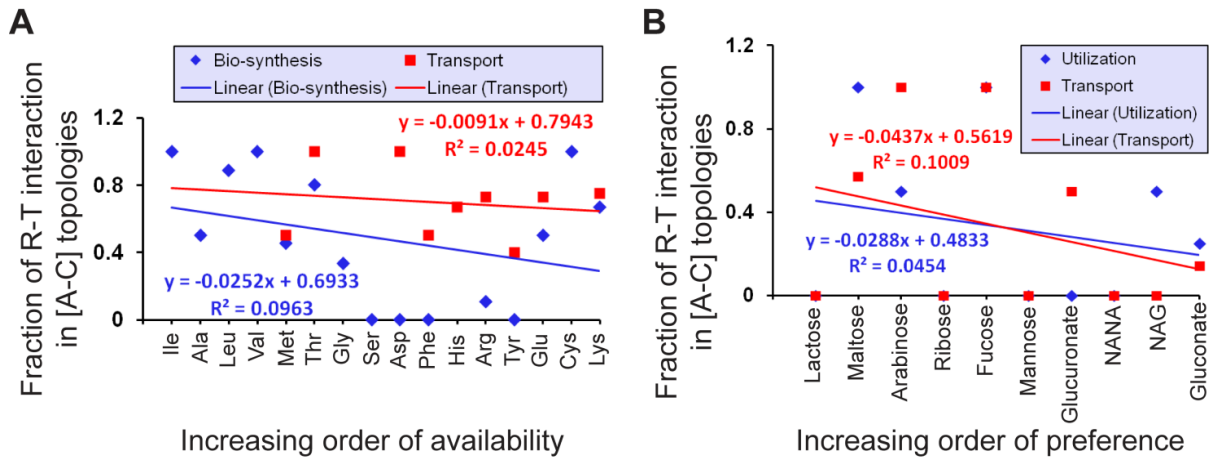

609

610

611

612 **Figure 8**

613

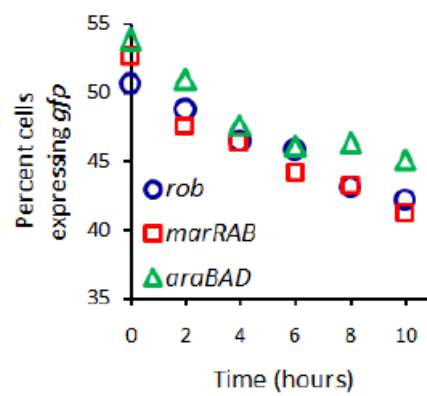

614

615

616

617 **Figure 9**

618

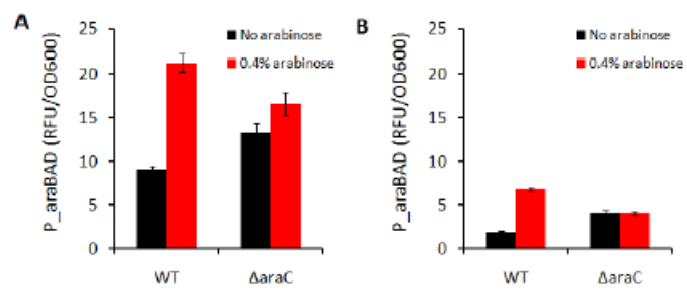

619
